# Supplementary material for: One-step fabrication of highly stable, durable, adhesion enhanced, flexible, transparent conducting films based on silver nanowires and neutralized PEDOT:PSS
Source: Royal Society of Chemistry journal article supplement (doi:10.1039/d3ma00031a), 2023-01-01
Supplement: d3ma00031a1.pdf [file d3ma00031a1.pdf]

## **One step fabrication of highly stable, durable, adhesion enhanced flexible, transparent conducting film based on silver nanowires and neutralized PEDOT:PSS**

Subramani Devaraju<sup>a,b</sup>, Aruna Kumar Mohanty<sup>a</sup>, Du-hyun Won<sup>a</sup>, Hyun-jong Paik<sup>a,\*</sup>

<sup>a</sup>Department of Polymer Science and Engineering, Pusan National University, 2, Busandaehak-ro 63beon-gil, Geumjeong-gu, Busan 46241, South Korea.

<sup>b</sup>Department of Chemistry, School of Applied Science and Humanities, Vignan's Foundation for Science, Technology and Research (Deemed to be University), Vadlamudi, Guntur, Andhra Pradesh, 522213, India.

E-mail: [hpaik@pusan.ac.kr](mailto:hpaik@pusan.ac.kr) (Hyun-jong Paik)

### **Experimental**

#### **Materials**

Silver nanowires (AgNWs) (0.5 wt.% in water) with diameter of 20~25 nm and length of 25~30  $\mu\text{m}$  was received from N&B Co. Ltd, Korea. PEDOT:PSS (AGFA 1021; ratio of PEDOT to PSS, 1:2.5, 1.3 wt.% aqueous dispersion) and polysiloxane were received from Solvay chemicals Korea. 3,4-Ethylenedioxythiophene (EDOT, XZL Chemical, 99.8%) was used as received. Dimethyl sulfoxide (DMSO), isopropyl alcohol (IPA) were used as received from Daejung chemicals. Imidazole and hydroxypropyl methyl cellulose (HPMC) were received from Sigma Aldrich. Polyethylene terephthalate (SH40 (PET, a thickness of 188  $\mu\text{m}$ ) was purchased from SKC, Korea.

#### **Preparation of AgNWs/N-PEDOT:PSS hybrid dispersions**

Acidic PEDOT:PSS was neutralized by adjusting the pH from ~1.3 to 7.0 using aqueous imidazole solution (1 M). The neutralized PEDOT:PSS weight was adjusted to 0.5 wt.% using IPA, DMSO and distilled water. AgNWs/PEDOT:PSS hybrid dispersion was prepared by mixing of AgNWs with neutralized PEDOT:PSS solution with the different weight ratios (1:0, 1:1, 2:1, and 0:1). Then 5 wt.% of HPMC (1.0 wt.% aqueous solution) was added to the solution and thoroughly mixed for 1-2 h by roll mixer. The AgNWs hybrid dispersion was utilized for

the fabrication of TCEs and further characterizations.

### **Characterizations**

The sheet resistance of pristine AgNWs and hybrid TCF films were measured by CMTSR1000N four-point probe measurement (A.I.T.). The surface morphology of the AgNWs hybrid films was investigated using an S-4800 field emission scanning electron microscope (FE-SEM, Hitachi). The surface topology of all the film samples was analysed from AFM (n-Tracer, NanoFocus Inc.). AFM images were taken using in tapping-mode with a silicon-mounted cantilever ( $T < 10$  nm,  $L = 125$   $\mu\text{m}$ ,  $f = 200\text{--}400$  kHz,  $k = 25\text{--}75$   $\text{Nm}^{-1}$ ). The transmittance and absorbance of the AgNWs hybrid film samples were recorded in the OPTIZEN 322UV spectrometer. The flexibility and durability of the AgNWs hybrid TCFs were tested by measuring the change in resistance using a computer system with a digital multimeter (Agilent 34401A) during the cyclic bending test. The cyclic bending test was performed on rectangular TCF samples. The tests were carried out using a home-made fatigue machine with a constant linear vertical movement of 10 mm at 2 Hz stroke. A cyclic bending stress was applied to the films dynamically using a moving jig.

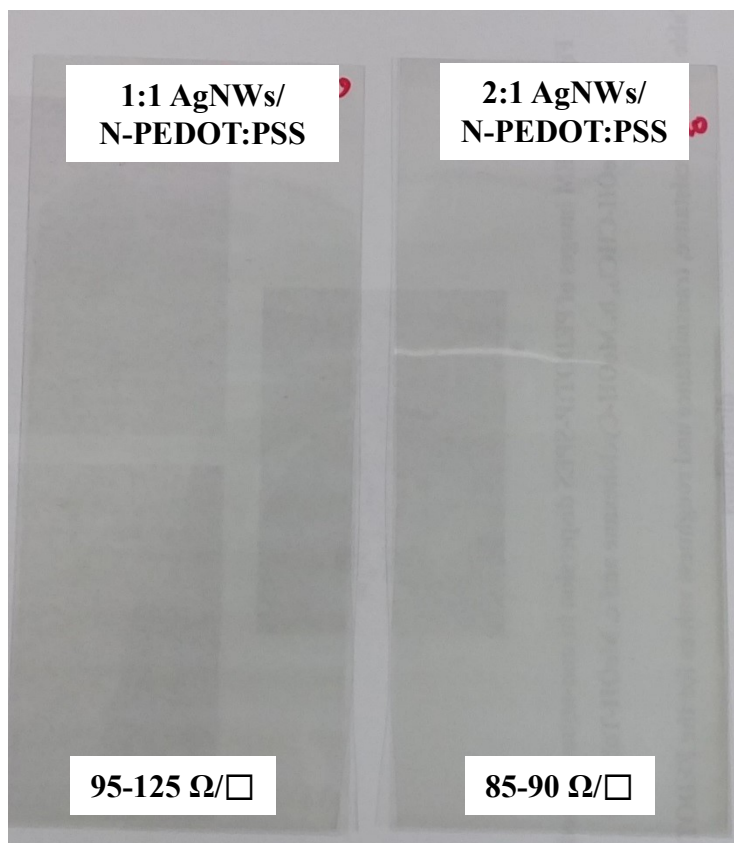

Figure S1: Photo images of hybrid AgNWs/N-PEDOT:PSS TCFs from 0.5 wt.% AgNWs and 1.3 wt. % N-PEDOT:PSS dispersion.

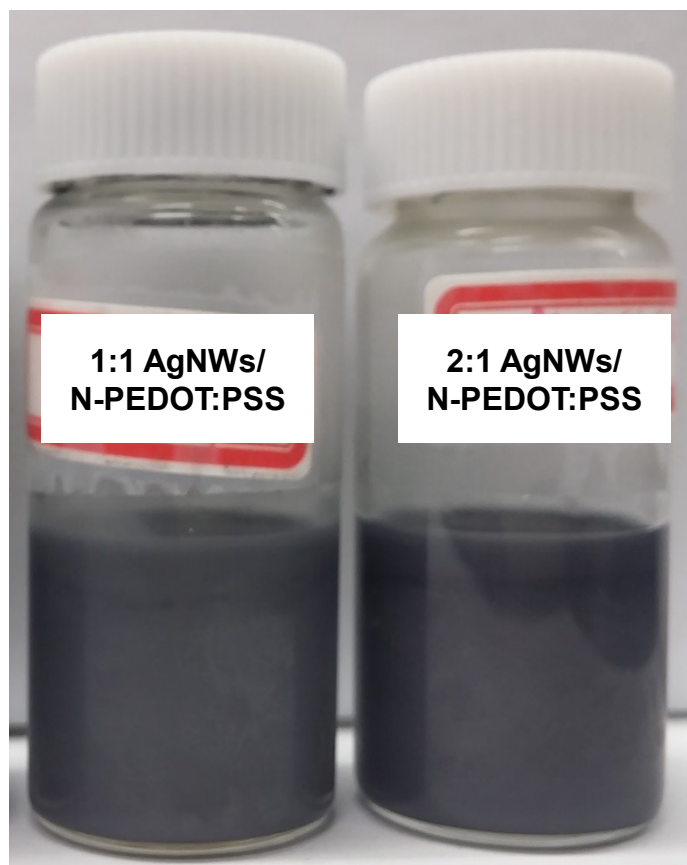

Figure S2: Photo images of hybrid AgNWs/N-PEDOT:PSS solutions from 0.5 wt.% AgNWs and 0.5 wt. % N-PEDOT:PSS dispersion.

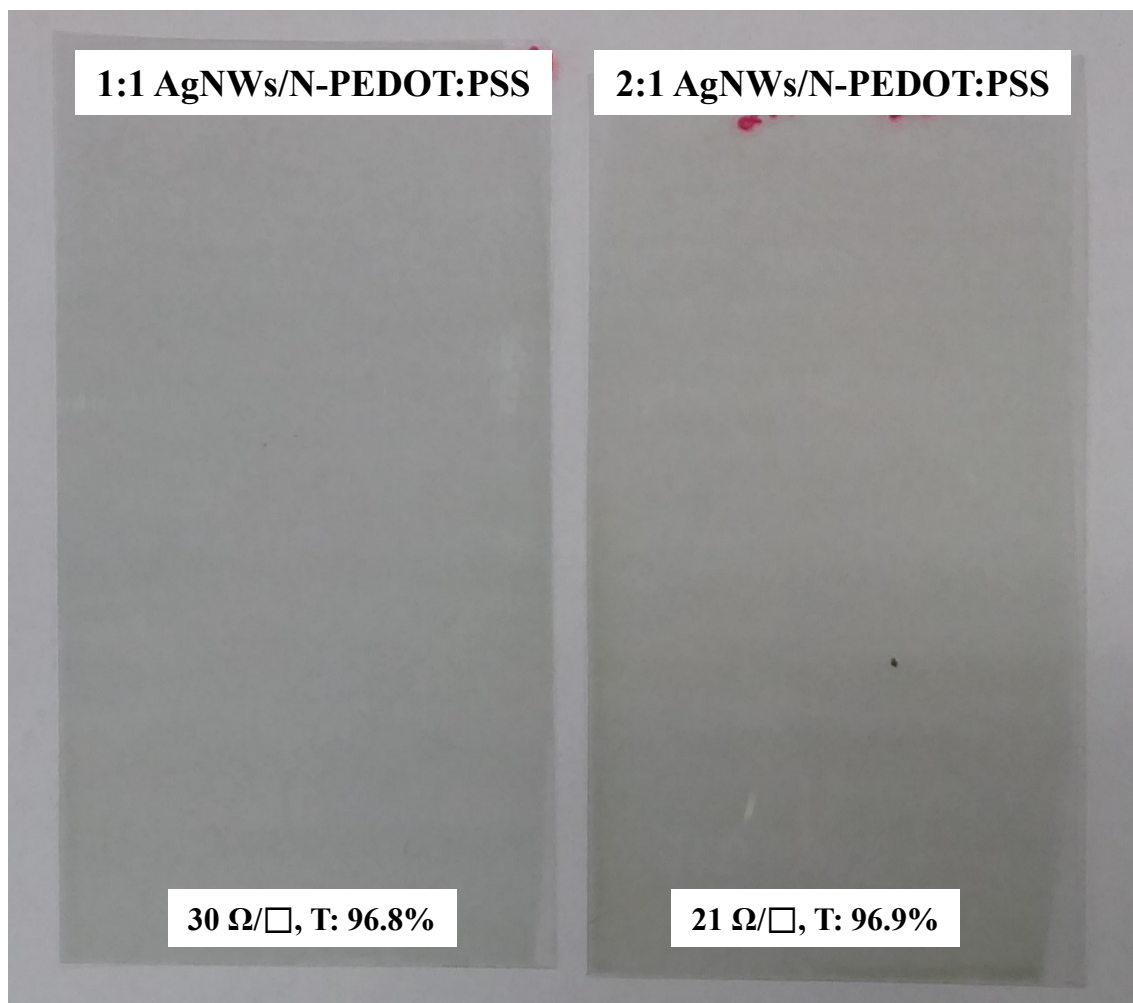

Figure S3: Photo images of hybrid AgNWs/N-PEDOT:PSS TCFs from 0.5 wt.% AgNWs and 0.5 wt. % N-PEDOT:PSS dispersion.

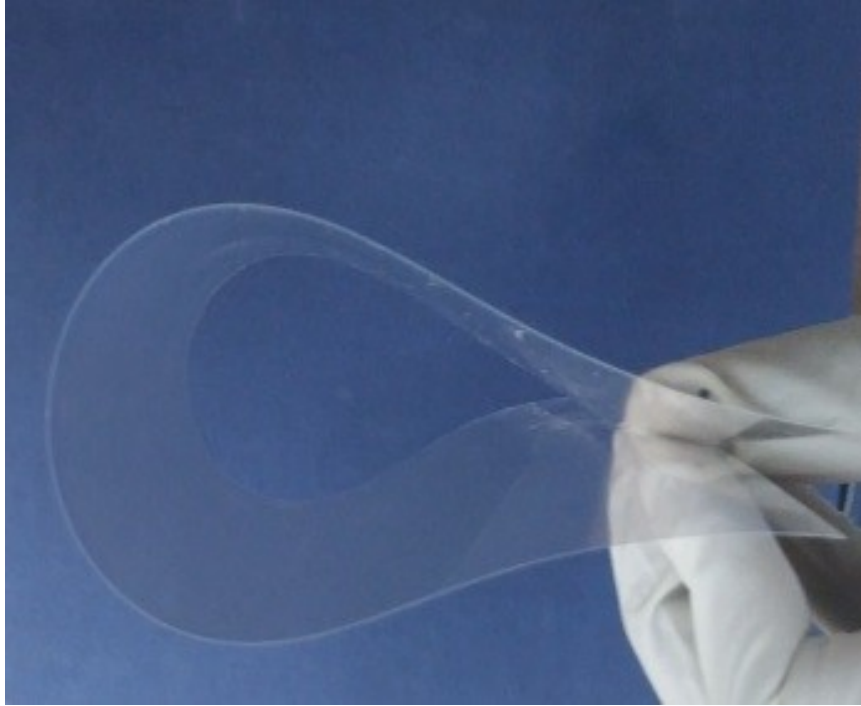

Figure S4: Photo image of hybrid AgNWs/N-PEDOT:PSS dispersion coated on flexible PET substrate.

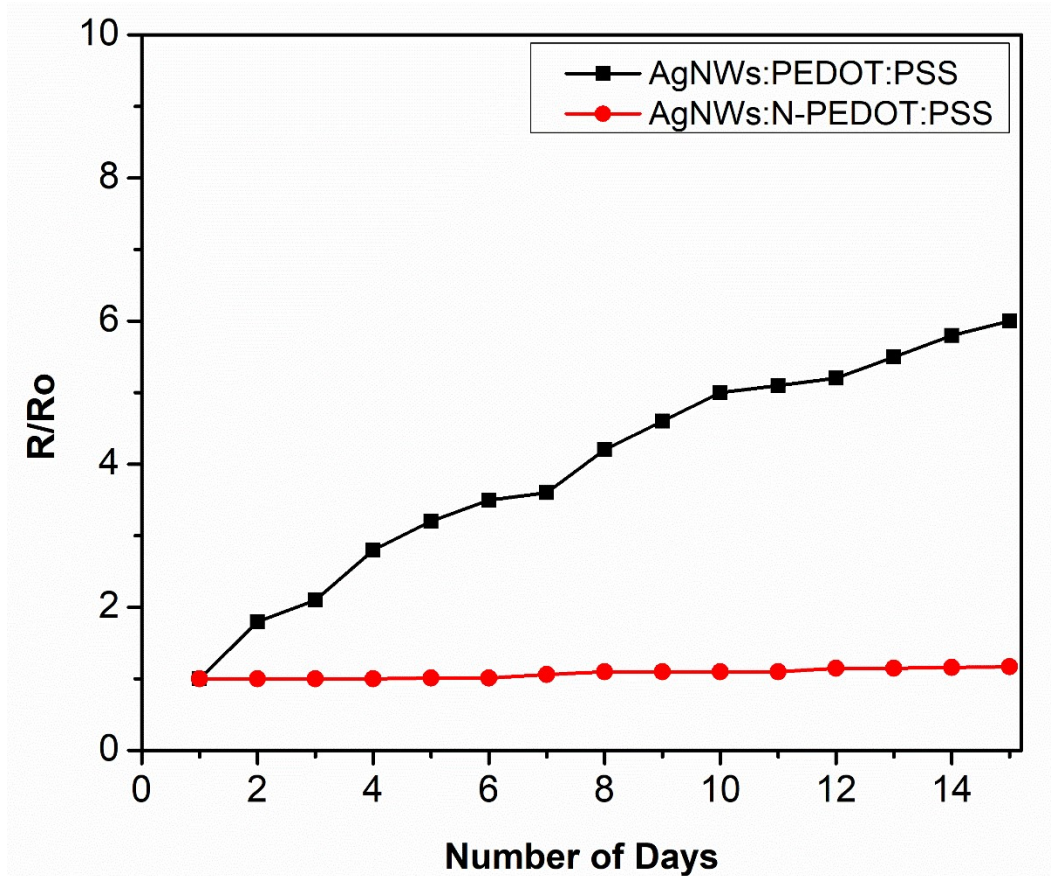

Figure S5: Sheet resistance vs time plot of AgNWs/PEDOT:PSS (un-neutral) and AgNWs/N-PEDOT:PSS (neutral) TCFs.

Table S1. Sheet resistance, transmittance, haze and roughness of the pristine AgNWs, AgNWs/N-PEDOT:PSS hybrid TCF films in comparison with already reported TCFs

| Samples (W/W)                                                        | Sheet Resistance (Rs) $\Omega/\square$ | Transmittance (%) | Haze (%)      | Roughness (nm) | References |
|----------------------------------------------------------------------|----------------------------------------|-------------------|---------------|----------------|------------|
| AgNWs:N-PEDOT:PSS (1:1)                                              | 29.7<br>30.0*                          | 94.91<br>96.89*   | 0.96<br>0.76* | 9.4            | This work  |
| AgNWs:N-PEDOT:PSS (2:1)                                              | 22.0<br>21*                            | 94.59<br>96.99*   | 1.28<br>1.04* | 11.2           | This work  |
| AgNWs:N-PEDOT:PSS (0:1)                                              | 700                                    | 94.2              | -             | 0.3            | This work  |
| AgNWs                                                                | 79.2                                   | 98.6              | 4.18          | 31.1           | 56         |
| AgNWs/PEDOT:PSS                                                      | ~75                                    | >90               | 1.21          | 17.9           | 56         |
| AgNWs Cross aligned                                                  | 18.8-42.3                              | 93.5-97.0         | -             | -              | 5          |
| AgNWs Random aligned                                                 | 15.9-88.6                              | 88.2-97.0         | -             | -              | 5          |
| Ultra-long AgNWs                                                     | 24-109                                 | 94-97             | 3.4-1.6       |                | 76         |
| AgNWs/Silica sol/PEDOT:PSS                                           | 12                                     | 87.5              | -             | -              | 77         |
| AgNWs                                                                | 8.2                                    | 82.7              |               |                | 78         |
| Nb <sub>2</sub> O <sub>5</sub> /AgNWs/Nb <sub>2</sub> O <sub>5</sub> | 9.61                                   | 84.3              |               |                | 79         |
| AgNWs embedded HPMC                                                  | 15-260                                 | 65-88             | 6-0.2         | 4.8±0.5        | 80         |
| AgNWs coated HPMC                                                    | 15-270                                 | 55-83             | 9-0.7         | 56.6±2         | 80         |
| AgNWs                                                                | 30-480                                 | 82.8-93           | 8-2           | >20            | 63         |
| AgNWs/PEDOT:PSS                                                      | 15                                     | 90                | 1             | -              | 81         |
| AgNWs/CA                                                             | 28.62-81.68                            | 88.21-89.86       |               |                | 82         |
| AgNWs/PEDOT:PSS                                                      | 23                                     | 86                | -             | -              | 11         |
| AgNWs/PEDOT:PSS                                                      | 22-43.4                                | 90.8-92.9         | 2-3.8         | 19.6-31.3      | 54         |
| AgNWs/PEDOT:PSS                                                      | 16                                     | 90.4              | -             | -              | 62         |
| AgNWs/PEDOT:PSS/PVA Silane                                           | 20                                     | 95.4              | 1.6           | -              | 57         |
| AgNWs/PEDOT:PSS                                                      | 17                                     | 83                | -             | 20-30          | 4          |
| AgNWs/PEDOT:PSS                                                      | 25-54                                  | 85-90             | -             | -              | 21, 50     |
| AgNWs/PEDOT:PSS                                                      | 10.76                                  | 84.3              |               | 51.8           | 75         |
| MPS-AgNW/PEDOT:PSS                                                   | 22.6                                   | 81.4              |               |                | 24         |
| AgNWs/Graphene                                                       | 33                                     | 94                |               |                | 22         |
| AgNWs/Single layer Graphene                                          | 22                                     | 88                |               |                | 37         |



|             |             |             |          |      |    |
|-------------|-------------|-------------|----------|------|----|
| DWCNT       | 35          | 90          |          | 10.5 | 28 |
| AgNWs/SWCNT | 8.7         | 66.4        | 11.0     |      | 83 |
| AgNWs/SWCNT | 20.87-81.76 | 95.33-98.45 | 1.8-0.21 | -    | 84 |

\*Overcoat with polysiloxane
